# Supplementary material for: Comparative study of the efficacy of intra-arterial and intravenous transplantation of human induced pluripotent stem cells-derived neural progenitor cells in experimental stroke
Source: PeerJ. 2023 Nov 9;11:e16358. doi: 10.7717/peerj.16358 (PMC10640846; doi:10.7717/peerj.16358)
Supplement: Supplemental Information 1 — The data reflecting changes in the weight, neurological status of animals, damage volume and presented in dynamics. [file peerj-11-16358-s001.xlsx]

## Sheet: общая таблица
№ animal
	Group	administration	survival	weight	weight 1 d, g	weight 7 d, g	weight 14 d, g	mNSS 1 d, point	mNSS 7 d, point	mNSS 14 d, point	V damage, 1d, mm3	V damage, 7d, mm3	V damage, 14 d, mm3
1	iNPCs-IV	1	14	239	223	222	235	11	7	6	124.357	118.829	100.368
2	iNPCs-IV	1	14	267	249	241	250	7	6	5	116.291	80.214	73.748
3	iNPCs-IV	1	14	324	318	308	330	8	6	5	121.516	106.039	87.4
4	iNPCs-IV	1	14	231	222	220	250	7	7	6	71.89	65.468	60.664
5	iNPCs-IV	1	14	216	201	188	250	9	7	7	125.917	121.544	102.644
6	iNPCs-IV	1	14	228	211	176	230	12	9	6	180.279	171.793	150.242
7	iNPCs-IV	1	14	218	206	200	200	10	7	7	127.751	113.91	103.397
8	iNPCs-IV	1	14	218	203	210	209	8	7	5	168.792	141.017	129.709
9	iNPCs-IV	1	14	270	256	260	290	9	6	5	119.9	95.699	83.788
10	iNPCs-IV	0	1	272	245			11			195.994
11	iNPCs-IV	1	14	255	235	244	255	11	6	5	139.84	128.278	106.825
12	iNPCs-IV	1	14	244	227	235	250	8	5	4	120.128	110.697	97.341
13	iNPCs-IV	1	14	233	216	224	235	9	5	4	146.872	120.482	106.549
14	iNPCs-IV	1	14	242	211	222	273	9	4	3	90.703	76.956	64.241
15	iNPCs-IV	1	14	300	291	263	285	8	7	6	124.059	113.868	104.834
1	Control	1	14	270	250	240	250	9	6	6	129.718	116.356	96.608
2	Control	0	10	250	236	200		11	8		147.462	125.107
3	Control	0	3	248	227			11			162.792
4	Control	1	14	266	240	228	237	11	7	7	115.563	105.734	85.06
5	Control	0	2	250	230			9			170.877
6	Control	0	13	230	220	190		9	9		123.404	90.419
7	Control	1	14	230	260	240	245	8	8	7	156.948	139.506	115.32
8	Control	1	14	280	260	250	250	7	6	7	64.991	59.612	46.403
9	Control	0	7	260	220	160		9	11		139.498	106.501
10	Control	1	14	270	254	250	280	9	6	7	81.505	60.335	52.631
11	Control	0	1	250	220			11			112.75
12	Control	1	14	250	236	182	138	10	8	8	150.16	133.013	114.71
13	Control	1	14	275	264	250	270	8	6	6	124.79	93.283	80.552
14	Control	1	14	284	257	267	264	10	6	6	111.71	95.81	80.54
15	Control	0	1	309	270			10			161.08
16	Control	1	14	275	240	191	169	9	7	7	165.66	150.88	143.02
17	Control	1	14	230	213	219	225	8	5	8	118.58	93.13	82.51
18	Control	0	1	233	209			11			182.57
19	Control	0	1	233	208			10			169.54
20	Control	1	14	250	240	224	229	9	8	7	131.25	118.93	102.77
21	Control	1	14	245	208	210	215	9	8	7	159.71	124.71	103.99
1	iNPCs-IA	1	14	230	201	210	245	10	5	2	95.082	86.274	68.95
2	iNPCs-IA	1	14	275	200	210	219	7	5	2	89.125	66.795	55.993
3	iNPCs-IA	1	14	280	254	239	291	11	6	2	89.513	68.738	54.788
4	iNPCs-IA	1	14	260	208	188	250	7	3	3	62.803	40.558	24.247
5	iNPCs-IA	1	14	274	220	235	280	9	3	2	93.724	81.34	69.69
6	iNPCs-IA	1	14	340	330	315	370	8	5	2	93.393	85.089	67.335
9	iNPCs-IA	1	14	270	255	280	290	10	6	3	50.865	22.287	14.961
10	iNPCs-IA	1	14	280	230	254	260	9	7	4	50.687	33.047	20.595
11	iNPCs-IA	1	14	304	233	260	265	8	5	3	53.515	35.139	22.387
12	iNPCs-IA	1	14	289	250	250	260	8	5	3	59.803	35.454	26.028
16	iNPCs-IA	1	14	280	250	265	270	9	6	4	86.124	79.292	72.46
